# Supplementary material for: Facile preparation and charge retention mechanism of polymer-based deformable electret
Source: Royal Society of Chemistry journal article supplement (doi:10.1039/d4sm00477a), 2024-01-01
Supplement: d4sm00477a1.pdf [file d4sm00477a1.pdf]

Supplementary Information

# Facile Preparation and Charge Retention Mechanism of Polymer-based Deformable Electret

*Takatsugu Endo, Rikuo Komine, Hiroyuki Hamada, Takumi Nakamura, Ryo Ishida, and Shun*

*Niguma*

**Table S1.** Interaction energies in  $\text{kJ mol}^{-1}$  for stable  $\text{H}_3\text{O}^+$ -model molecule complexes. The numbering corresponds to the ones in Figure S2.

|                              | 1      | 2      | 3      | 4      | 5     | 6     | 7      |
|------------------------------|--------|--------|--------|--------|-------|-------|--------|
| Succinic anhydride           | -205.4 | -191.5 |        |        |       |       |        |
| Isopropyl succinic anhydride | -220.9 | -207.0 | -205.1 | -187.5 | -39.9 | -21.2 | -217.5 |
| Butane                       | -72.6  | -58.1  |        |        |       |       |        |
| 2-Methylbutane               | -77.0  | -73.0  | -76.4  | -74.5  | -73.2 |       |        |
| 2,2-Dimethylbutane           | -80.1  | -78.5  | -76.3  | -72.3  | -68.5 | -75.3 |        |

**Table S2.** Results of curve fitting analyses for crystalline components in the WAXS patterns. Units of the position and the full width at half maximum (FWHM) are in  $\text{nm}^{-1}$ .

|             |          | Crystal    |            |            |            |            |            |            |
|-------------|----------|------------|------------|------------|------------|------------|------------|------------|
| MPP         | Position | 10.02±0.00 | 11.97±0.00 | 13.17±0.00 | 14.96±0.00 | 15.46±0.00 | 17.95±0.00 | 20.16±0.01 |
|             | FWHM     | 0.41±0.00  | 0.29±0.00  | 0.40±0.00  | 0.43±0.00  | 0.53±0.00  | 0.48±0.01  | 1.09±0.02  |
| PP          | Position | 10.03±0.00 | 12.00±0.00 | 13.19±0.00 | 14.99±0.00 | 15.49±0.00 | 17.99±0.00 | 20.22±0.00 |
|             | FWHM     | 0.37±0.00  | 0.28±0.00  | 0.37±0.00  | 0.43±0.00  | 0.48±0.00  | 0.38±0.01  | 0.89±0.01  |
| PBI/MPP     | Position | 10.01±0.00 | 12.06±0.00 | 13.13±0.00 | 14.93±0.01 | 15.42±0.00 |            |            |
|             | FWHM     | 0.28±0.00  | 0.34±0.00  | 0.38±0.00  | 0.39±0.01  | 0.61±0.01  |            |            |
| PBI/PP      | Position | 9.99±0.00  | 12.06±0.00 | 13.14±0.00 | 14.94±0.00 | 15.48±0.00 |            |            |
|             | FWHM     | 0.25±0.00  | 0.26±0.00  | 0.27±0.00  | 0.35±0.00  | 0.41±0.00  |            |            |
| PBI/PP/ODSA | Position | 10.00±0.00 | 12.06±0.00 | 13.15±0.00 | 14.95±0.00 | 15.49±0.00 |            |            |
|             | FWHM     | 0.25±0.00  | 0.25±0.00  | 0.27±0.00  | 0.33±0.00  | 0.40±0.00  |            |            |

**Table S3.** Results of curve fitting analyses for amorphous components in the WAXS patterns. Units of the position and the full width at half maximum (FWHM) are in  $\text{nm}^{-1}$ .

|     |          | Amorphous  |
|-----|----------|------------|
| MPP | Position | 12.49±0.00 |
|     | FWHM     | 6.26±0.01  |

|                 |          |            |            |
|-----------------|----------|------------|------------|
| PP              | Position | 12.38±0.01 |            |
|                 | FWHM     | 6.54±0.01  |            |
| PBI/MPP         | Position | 10.21±0.00 | 11.09±0.00 |
|                 | FWHM     | 2.86±0.00  | 7.24±0.01  |
| PBI/PP          | Position | 10.17±0.00 | 11.03±0.00 |
|                 | FWHM     | 2.85±0.00  | 7.18±0.01  |
| PBI/PP/O<br>DSA | Position | 10.24±0.00 | 11.15±0.00 |
|                 | FWHM     | 2.95±0.00  | 7.17±0.01  |

**Table S4.** Crystallinity estimated from the WAXS analyses (see Figure S3). Crystallinity is defined as crystallinity = (total area of crystalline peaks)/(total area of crystalline and amorphous peaks).

|             | Crystallinity / % |
|-------------|-------------------|
| MPP         | 41.4±0.1          |
| PP          | 45.2±0.1          |
| PBI/MPP     | 4.5±0.0           |
| PBI/PP      | 5.2±0.0           |
| PBI/PP/ODSA | 5.0±0.0           |

**Table S5.** Periodic length ( $d$ ) estimated from the SAXS patterns.

|             | $d$ / nm |
|-------------|----------|
| MPP         | 13.1±0.0 |
| PP          | 14.0±0.0 |
| PBI/MPP     | -        |
| PBI/PP      | 18.5±0.0 |
| PBI/PP/ODSA | 19.6±0.0 |

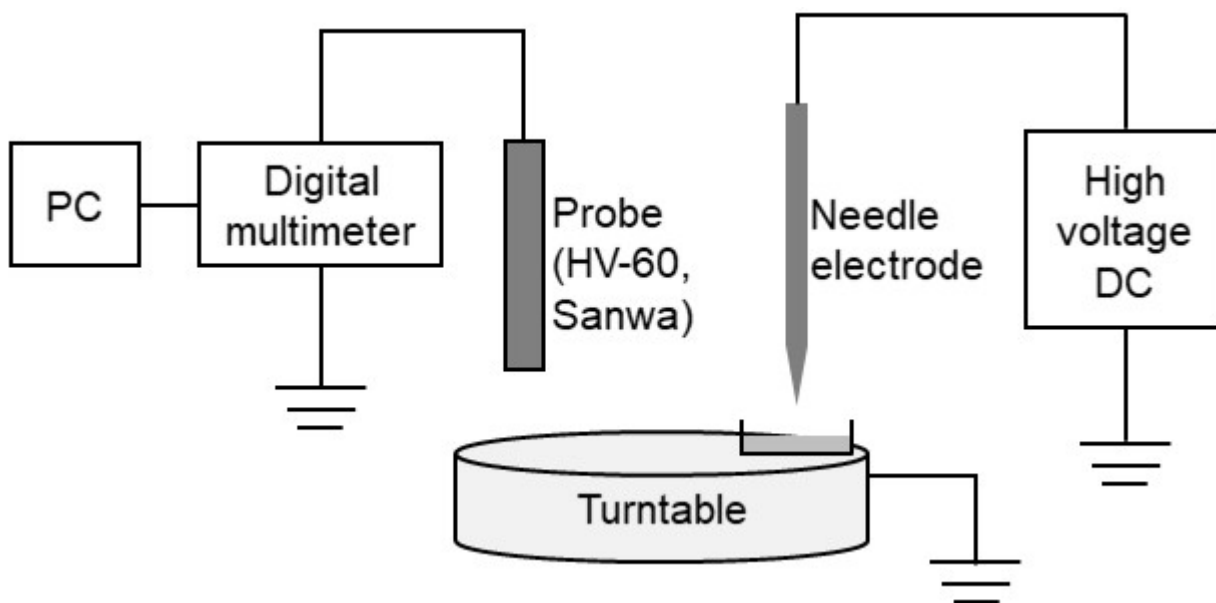

**Figure S1.** Measurement system for surface potential decay.

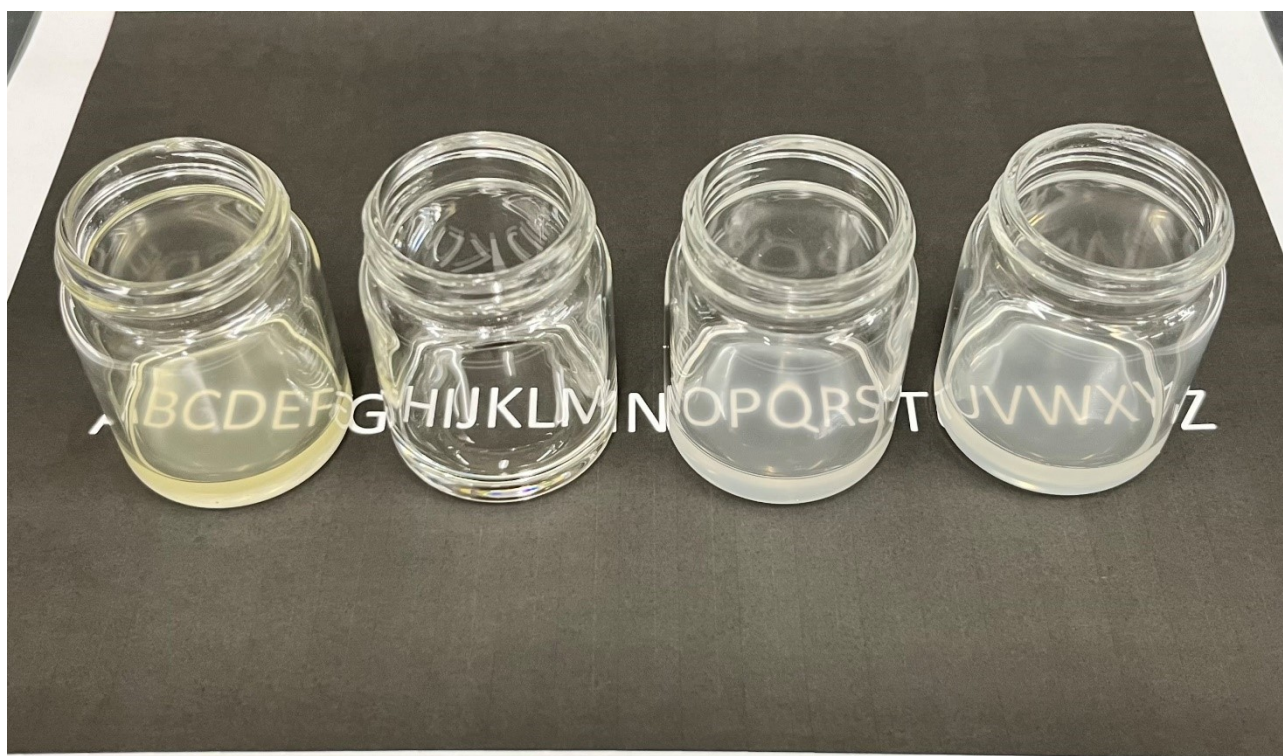

**Figure S2.** Appearance of the samples, PB/MPP, PB/ODSA, PB/PP, and PB/PP/ODSA from left to right. PB/MPP is in a pale yellow coming from the purchased MPP color.

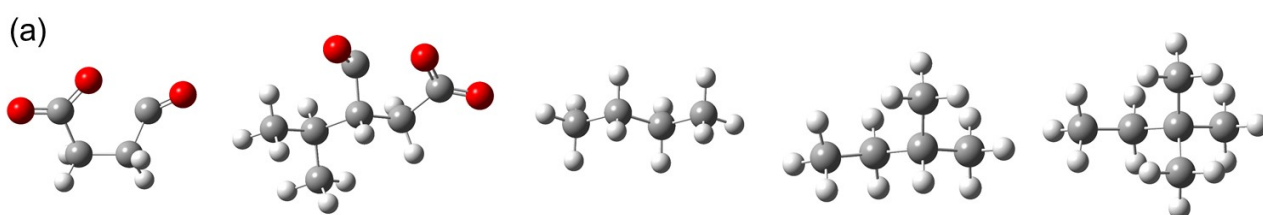

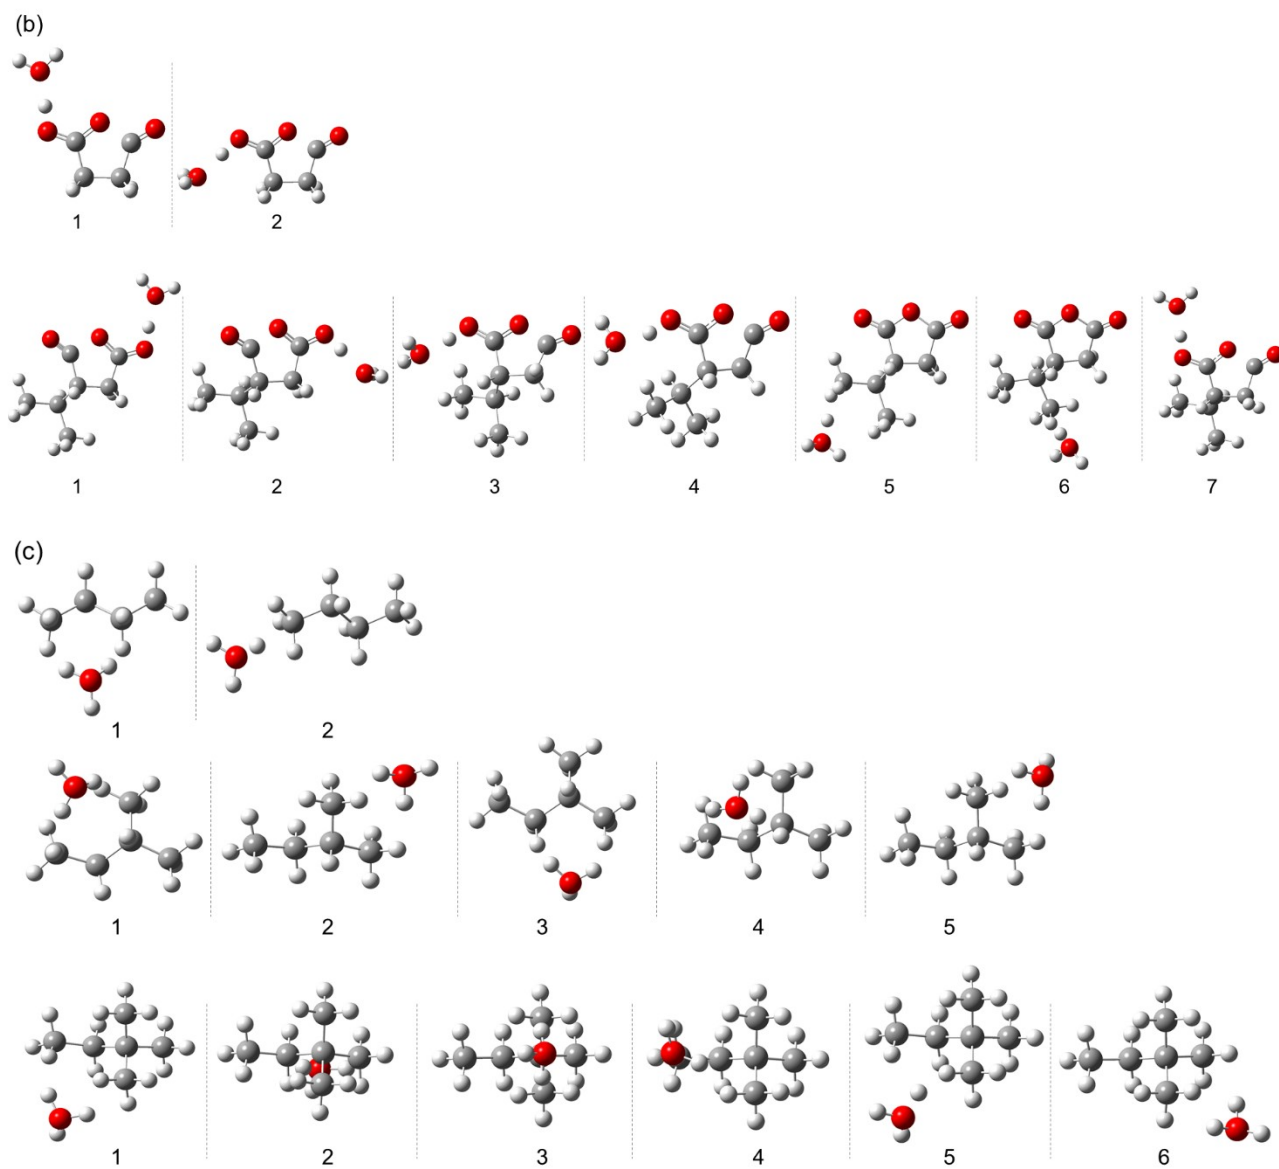

**Figure S3.** Calculated stable ion-model molecule complexes. (a) Electron-model molecules (i.e., anion radical), (b)  $\text{H}_3\text{O}^+$ -polar molecules, and (c)  $\text{H}_3\text{O}^+$ -nonpolar molecules.

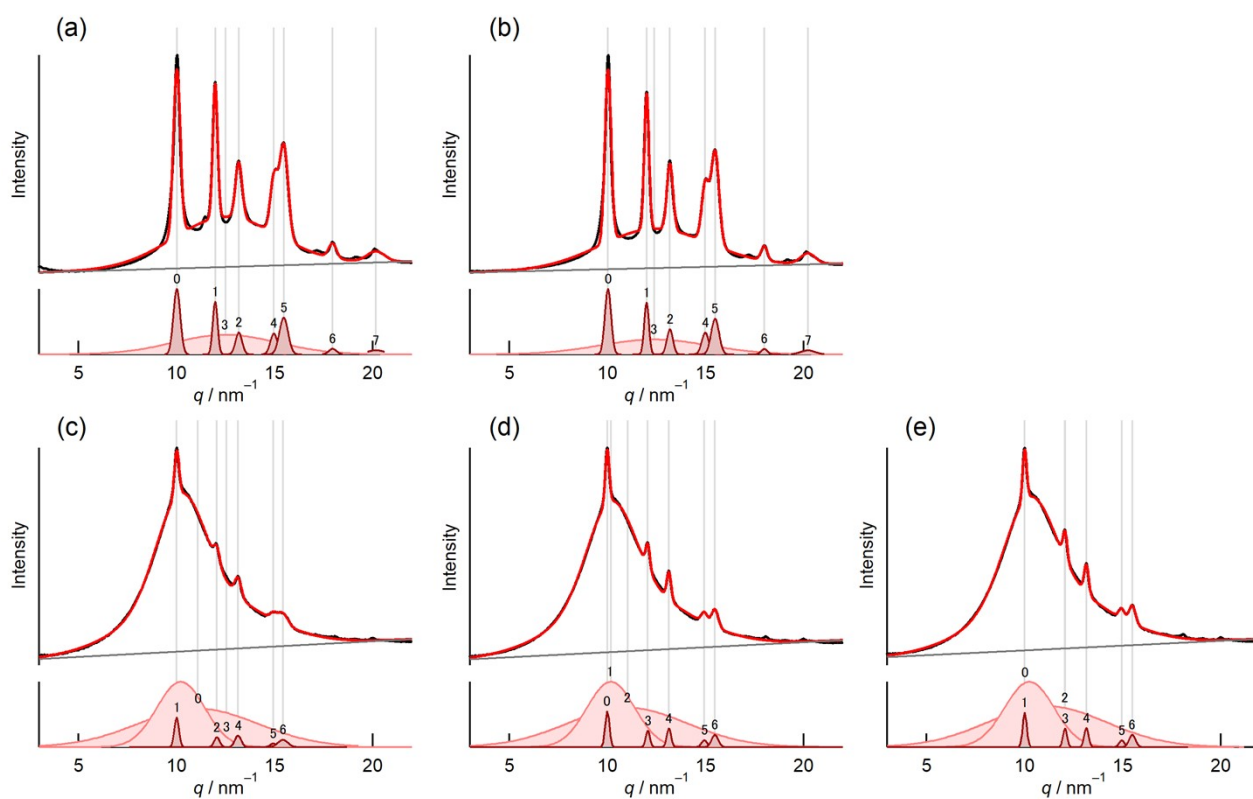

**Figure S4.** WAXS curve fitting analyses for (a) MPP, (b) PP, (c) PBI/MPP, (d) PBI/PP, and (e) PBI/PP/ODSA. Black and red lines are experimental and fitted patterns, respectively. Crystalline components represent in dark red whereas amorphous components are in pale red.

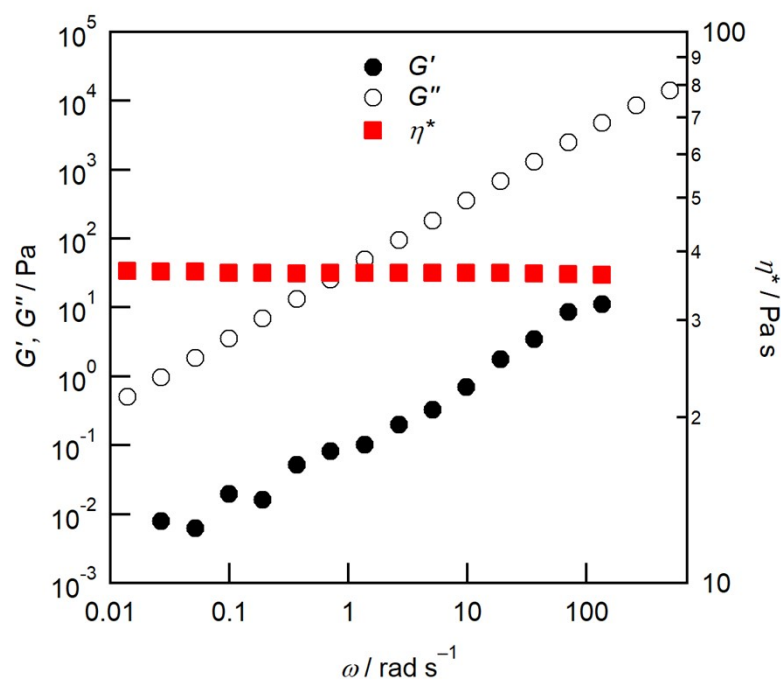

**Figure S5.** Storage modulus ( $G'$ ), loss modulus ( $G''$ ), and complex viscosity ( $\eta^*$ ) of PBI.

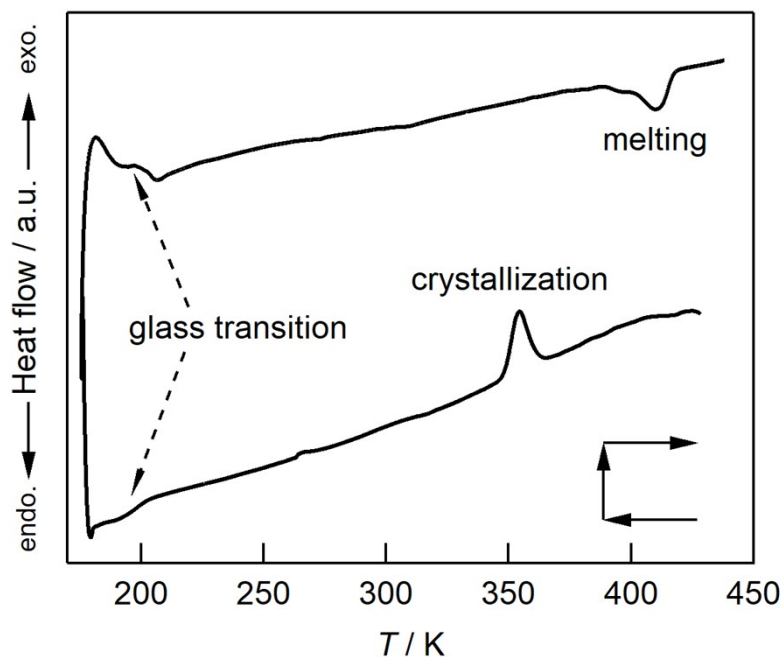

**Figure S6.** DSC traces of PBI/MPP. Measurements were started at 443 K and cooled at 10 K/min with a DSC7020 (Hitachi High-Tech Science). An exothermic peak at 354 K and an endothermic peak 410 K come from crystallization and melting of the polypropylene components, respectively.

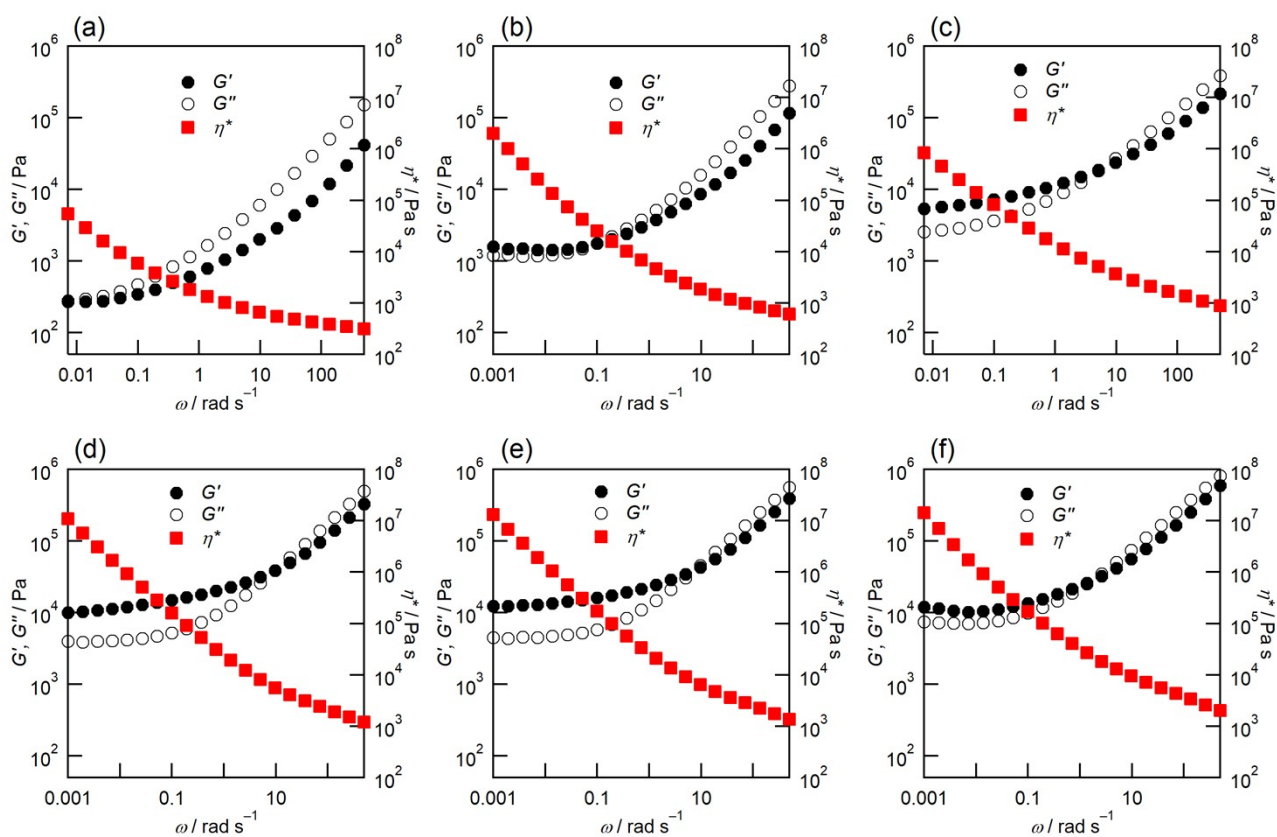



**Figure S7.** Storage modulus ( $G'$ ), loss modulus ( $G''$ ), and complex viscosity ( $\eta^*$ ) of PBI/PBh/MPP where (a) PBI:PBh = 8:2, (b) PBI:PBh = 6:4, (c) PBI:PBh = 4:6, (d) PBI:PBh = 2:8, (e) PBI:PBh = 1:9, and (f) PBI:PBh = 0:10.

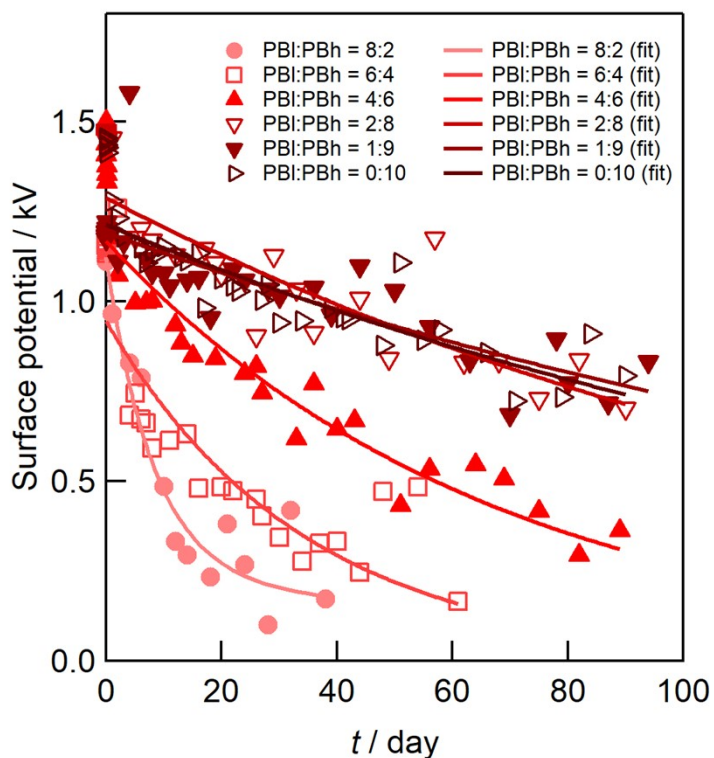

**Figure S8.** Surface potential decays of PBI/PBh/MPP where PBI:PBh = 8:2, PBI:PBh = 6:4, PBI:PBh = 4:6, PBI:PBh = 2:8, PBI:PBh = 1:9, and PBI:PBh = 0:10.

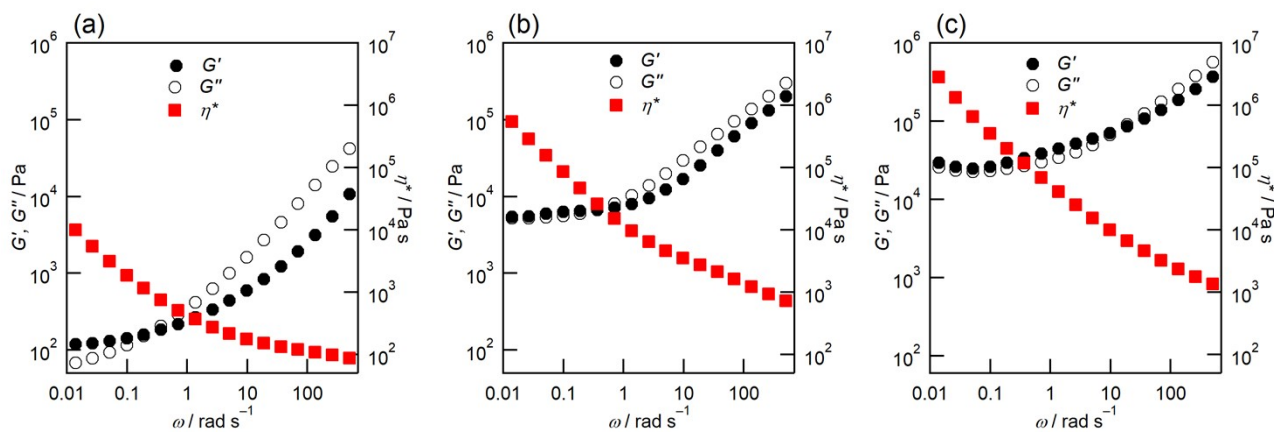

**Figure S9.** Storage modulus ( $G'$ ), loss modulus ( $G''$ ), and complex viscosity ( $\eta^*$ ) of PBI/MPP with different MPP concentrations. (a) 5 wt%, (b) 20 wt%, and (c) 30 wt%.



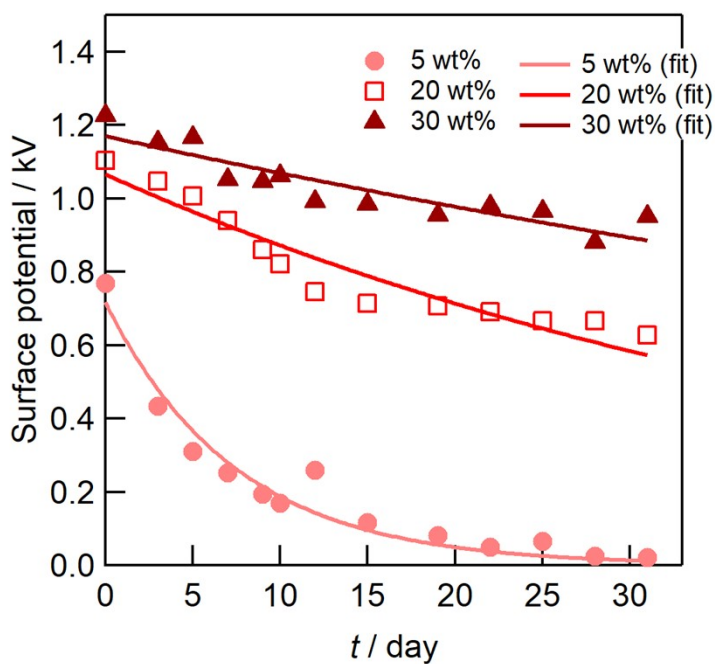

**Figure S10.** Surface potential decays of PBI/MPP with different MPP concentrations. (a) 5 wt%, (b) 20 wt%, and (c) 30 wt%.

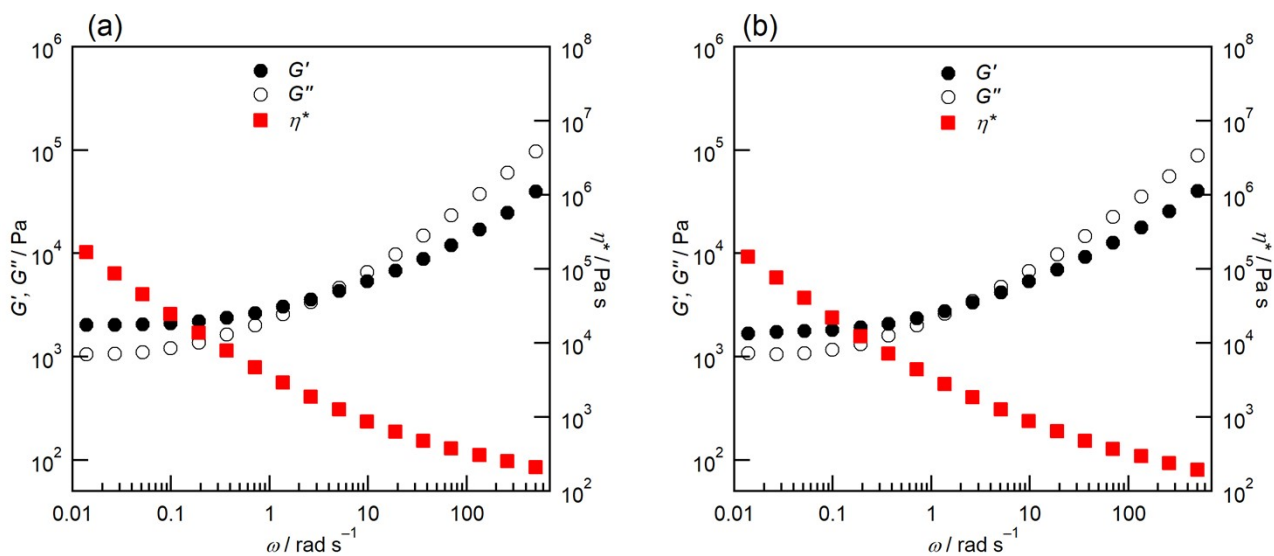

**Figure S11.** Storage modulus ( $G'$ ), loss modulus ( $G''$ ), and complex viscosity ( $\eta^*$ ) of (a) PBI/PP and (b) PBI/PP/ODSA.

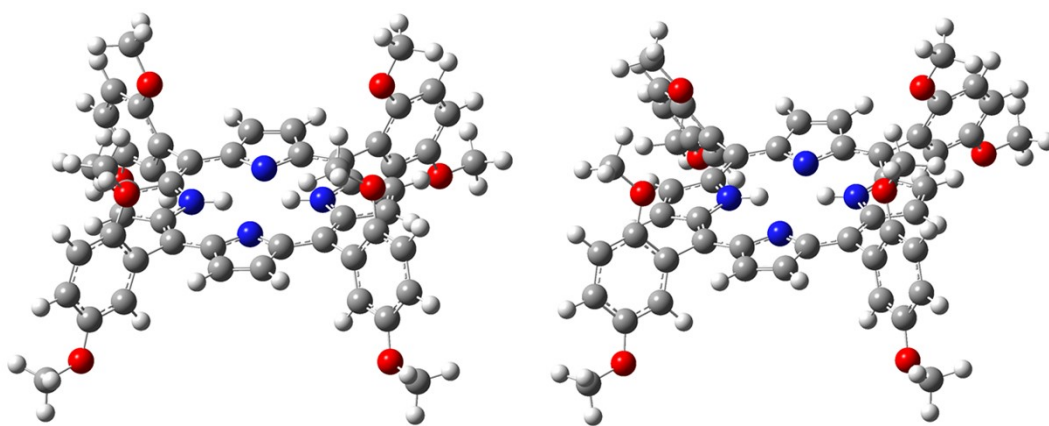

**Figure S12.** Calculated stable structures of a porphyrin derivative (left) and an electron-porphyrin complex (i.e., anion radical, right).
